# Supplementary material
Source: publisher figshare collection journal article supplement (https://gsajournals.figshare.com/ndownloader/files/25417241)
Supplement: Supplementary file 1 [file 25417241]

Supplementary Material

**Evolution of Chi motifs in Proteobacteria**

Angélique Buton & Louis-Marie Bobay

Department of Biology, University of North Carolina Greensboro, 321 McIver Street, PO Box 26170, Greensboro, NC 27402, USA

**Table S5**. Number of species identified with Chi motifs (830 motifs searched).

| **Number of models considered** | **Number of species** | **Proteobacteria** | **%** | **Terrabacteria** | **%** |
| --- | --- | --- | --- | --- | --- |
| 1 | 58 | 38 | 65,5 | 20 | 34,5 |
| 2 | 13 | 9 | 69,2 | 4 | 30,8 |
| 3 | 0 | 0 | 0 | 0 | 0 |
| 4 | 0 | 0 | 0 | 0 | 0 |
| 5 | 0 | 0 | 0 | 0 | 0 |
| 6 | 0 | 0 | 0 | 0 | 0 |
